# Supplementary material
Source: publisher figshare collection journal article supplement (https://gsapubs.figshare.com/ndownloader/files/22409607)
Supplement: Supplementary file 1 [file 22409607]

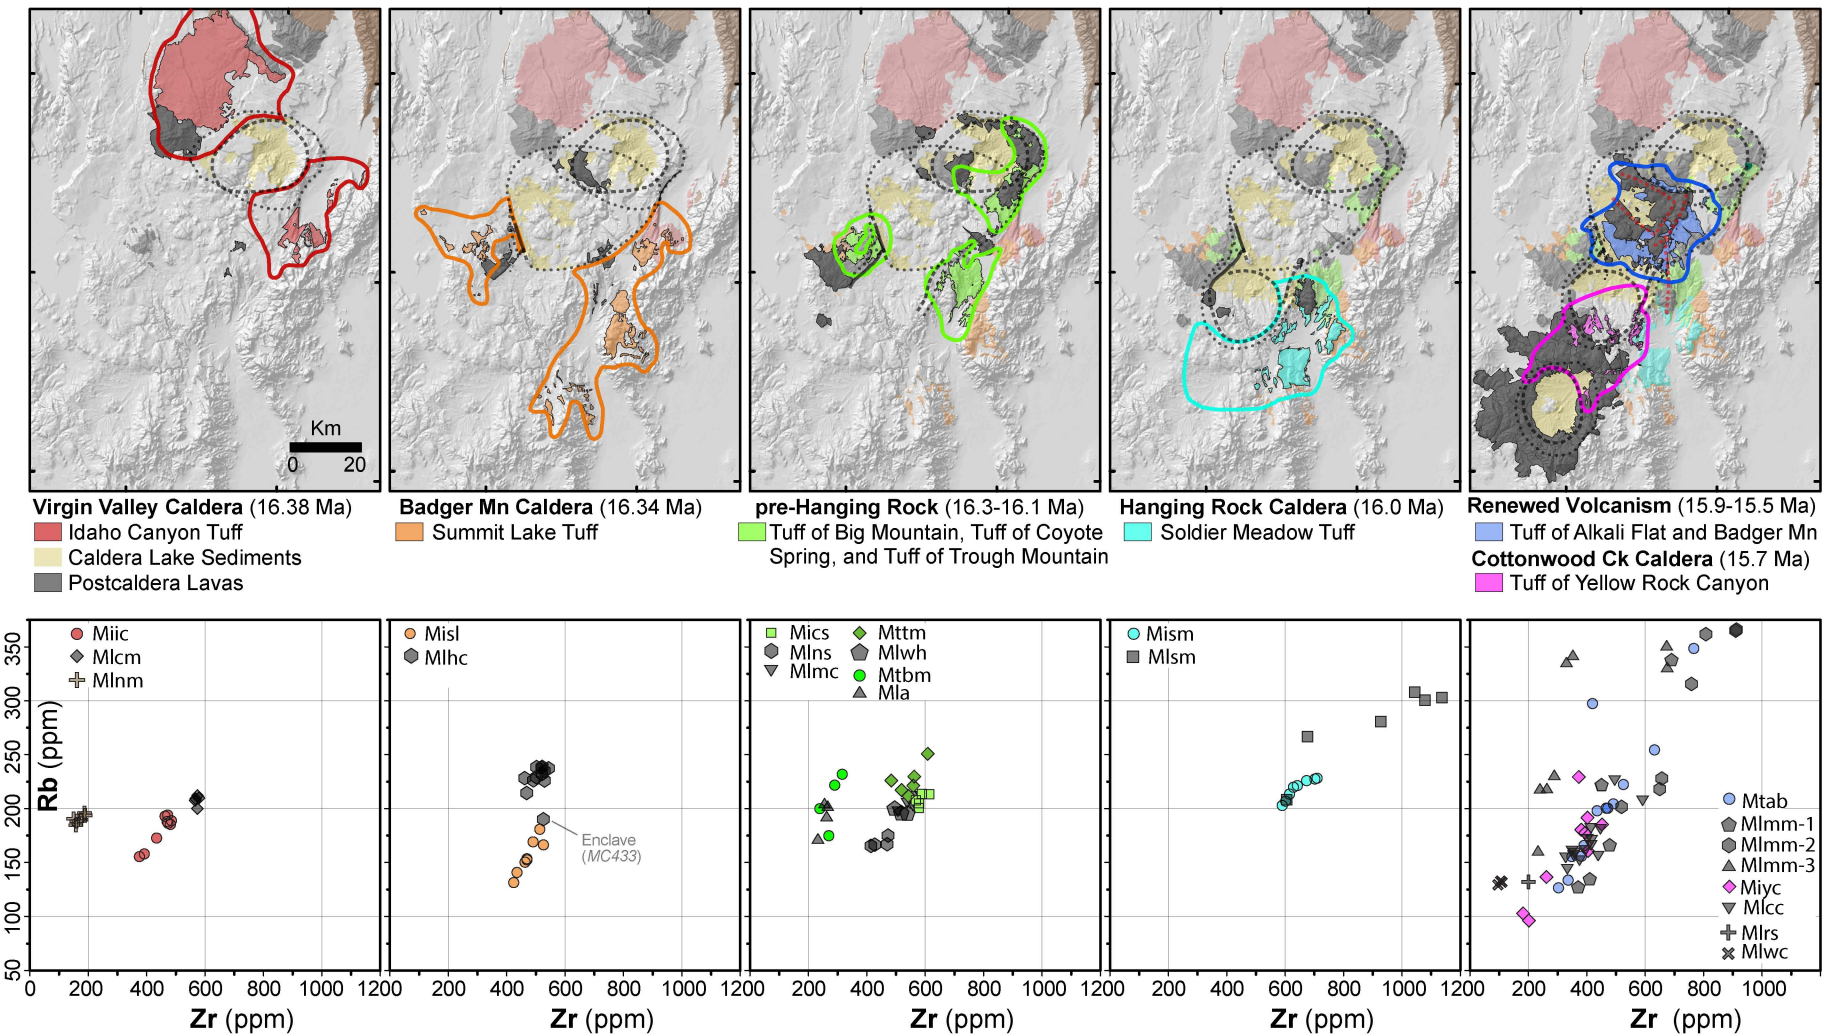

Supplemental Figure 1

Coble, M.A., and Mahood, G.A., 2016, Geology of the High Rock caldera complex, northwest Nevada, and implications for intense rhyolitic volcanism associated with flood basalt magmatism and the initiation of the Snake River Plain–Yellowstone trend: *Geosphere*, v. 12, doi:10.1130/GES01162.1.
